# Supplementary material
Source: PubMed Central journal article supplement (PMC4611508)
Supplement: ismej201555x1.pdf [file ismej201555x1.pdf]

## Supplemental information to Salcher et al.:

**Table S1:** Details of the isolation experiments conducted in Lake Zurich, Switzerland during 2010-2013.

**Table S2:** Genes involved in methylotrophic pathways present in the genomes of 'Ca. Methylopumilus planktonicus' MMS-2-53 and 'Ca. Methylopumilus turicensis' MMS-10A-171.

**Figure S1:** Relative abundances (in % of DAPI) of microbes affiliated with LD28 ('Ca. Methylopumilus planktonicus', upper panel) and PRD01a001B ('Ca. Methylopumilus turicensis', lower panel) determined in Lake Zurich, Switzerland, during the investigation period 2008-2011.

**Figure S2:** Physical (A: water temperature, F: spherical irradiance), chemical (B: oxygen content, C: concentration of PO<sub>4</sub>-P, D: NO<sub>3</sub>-N, E: NH<sub>4</sub>-N), and biological (G: concentration of total chlorophyll *a*, H: chlorophyll *a* associated with the cyanobacterium *Planktothrix rubescens*, I: chlorophyll *a* associated with diatoms) parameters determined in Lake Zurich, Switzerland, during the investigation period 2008-2011.

**Figure S3:** Bootstrapped maximum likelihood tree (GTR-Gamma model) of the 16S rDNA of microbes affiliated with LD28 ('Ca. Methylopumilus planktonicus'). Sequences in bold represent isolated strains from Lake Zurich (see table S1 for abbreviations). The scale bar at the bottom represents 1 % estimated sequence divergence.

**Figure S4:** Bootstrapped maximum likelihood tree (GTR-Gamma model) of the 16S rDNA of microbes affiliated with PRD01a001B ('Ca. Methylopumilus turicensis'). Sequences in bold represent isolated strains from Lake Zurich (see table S1 for abbreviations). The scale bar at the bottom represents 1 % estimated sequence divergence.

**Figure S5:** Graphic circular map of genome of 'Ca. Methylopumilus planktonicus' strain MMS-2-53. From outside to the center: Genes on forward strand, genes on reverse strand (both coloured in COG categories), BLASTx comparison to 3 closely related taxa ('Ca. Methylopumilus turicensis' strain MMS-10A-171, HTCC2181 of the marine OM43 lineage, and *Methylothera mobilis* JLW8), GC content, GC skew. COG classification was done with the WebMGA server (Wu et al., 2011) and the genome was displayed with the CGView server (Grant et al. 2008).

**Figure S6:** Graphic circular map of genome of 'Ca. Methylopumilus turicensis' strain MMS-10A-171. From outside to the center: Genes on forward strand, genes on reverse strand (both coloured in COG categories), BLASTx comparison to 3 closely related taxa ('Ca. Methylopumilus planktonicus' MMS-2-53, HTCC2181 of the marine OM43 lineage, and *Methylothera mobilis* JLW8), GC content, GC skew. COG classification was done with the WebMGA server (Wu et al., 2011) and the genome was displayed with the CGView server (Grant et al. 2008).

**Table S1:** Details of the isolation experiments conducted in Lake Zurich, Switzerland during 2010-2013.

| Date        | water temp | med | # wells inoc | # cells /well | # + wells   | # pure cult | # Meth     | V <sub>pos</sub> | V <sub>pure</sub> | V <sub>Meth</sub> | label     | Acc. No.     | Meth affil |
|-------------|------------|-----|--------------|---------------|-------------|-------------|------------|------------------|-------------------|-------------------|-----------|--------------|------------|
| 19/08/2010  | 19         | 1   | 288          | 1             | 74          | 19          | -          | 29.7             | 6.8               | -                 | MMS-1     | -            | -          |
| 14/10/2010  | 15.1       | 1   | 95           | 1             | 10          | 6           | 1          | 11.1             | 6.5               | 1.1               | MMS-2     | LN681407     | M. pla.    |
| 11/05/2011  | 16.7       | 1   | 95           | 1.4           | -           | -           | -          | -                | -                 | -                 | MMS-3     | -            | -          |
| 25/05/2011  | 13.2       | 1   | 95           | 1.4           | 40          | 2           | 1          | 40.3             | 1.6               | 0.8               | MMS-4     | LN681408     | M. pla.    |
| 07/06/2011  | 19.1       | 1   | 95           | 1.4           | 8           | -           | -          | 6.5              | -                 | -                 | MMS-5     | -            | -          |
| 22/06/2011  | 19.7       | 1   | 95           | 1.4           | 11          | -           | -          | 9.1              | -                 | -                 | MMS-6     | -            | -          |
| 06/07/2011  | 21.5       | 1   | 95           | 1.4           | 42          | -           | -          | 43.0             | -                 | -                 | MMS-7     | -            | -          |
| 19/07/2011  | 21.0       | 1   | 95           | 1.4           | 32          | 1           | -          | 30.3             | 0.8               | -                 | MMS-8     | -            | -          |
| 04/08/2011  | 20.6       | 2   | 95           | 1.4           | 26          | -           | -          | 23.6             | -                 | -                 | MMS-9     | -            | -          |
| 17/08/2011  | 21.1       | 3   | 95           | 1.4           | 39          | -           | -          | 38.9             | -                 | -                 | MMS-10    | -            | -          |
| 24/08/2011  | 24.7       | 3   | 95           | 1.4           | 25          | -           | -          | 22.5             | -                 | -                 | MMS-11    | -            | -          |
| 08/09/2011  | 20.9       | 3   | 95           | 1.4           | 56          | 1           | 1          | 65.6             | 0.8               | 0.8               | MMS-12    | LN681409     | M. pla.    |
| 21/09/2011  | 19.4       | 3   | 167          | 3.2           | 94          | 4           | 4          | 25.5             | 0.8               | 0.8               | MMS-13    | LN681410-13  | M. pla.    |
| 05/10/2011  | 19.4       | 3   | 119          | 2.8           | 79          | 7           | 3          | 38.8             | 2.2               | 0.9               | MMS-14    | LN681414-16  | M. pla.    |
| 18/10/2011  | 15.2       | 3   | 119          | 2.8           | 88          | 24          | 17         | 47.9             | 8.0               | 5.5               | MMS-15    | LN681417-33  | M. pla.    |
| 03/11/2011  | 12.7       | 3   | 119          | 2.8           | 67          | 3           | 2          | 29.5             | 0.9               | 0.6               | MMS-16    | LN681434-35  | M. pla.    |
| 16/11/2011  | 11.3       | 3   | 119          | 2.8           | 94          | 18          | 16         | 55.6             | 5.8               | 5.1               | MMS-17    | LN681436-51  | M. pla.    |
| 30/11/2011  | 9.3        | 3   | 119          | 2.8           | 21          | 15          | 13         | 6.9              | 4.8               | 4.1               | MMS-18    | LN681452-64  | M. pla.    |
| 14/12/2011  | 7.4        | 3   | 192          | 2.8           | 63          | 18          | 18         | 26.9             | 5.8               | 5.8               | MMS-19    | LN681465-82  | M. pla.    |
| 10/05/2012  | 12.1       | 4   | 191          | 2.4           | 28          | 25          | -          | 6.7              | 6.5               | -                 | MMS-20    | -            | -          |
| 25/05/2012  | 13.5       | 4   | 168          | 2.0           | 18          | 17          | -          | 5.7              | 5.3               | -                 | MMS-21    | -            | -          |
| 01/06/2012  | 13.5       | 4   | 144          | 2.7           | -           | -           | -          | -                | -                 | -                 | MMS-22    | -            | -          |
| 01/06/2012  | 13.5       | 5   | 144          | 1.7           | -           | -           | -          | -                | -                 | -                 | MMS-F3    | -            | -          |
| 20/06/2012  | 17.8       | 6   | 24           | 2.3           | 10          | 10          | -          | 23.1             | 23.1              | -                 | MMS-5H    | -            | -          |
| 20/06/2012  | 17.8       | 4   | 72           | 2.3           | 2           | 2           | -          | 1.2              | 1.2               | -                 | MMS-3A    | -            | -          |
| 20/06/2012  | 17.8       | 4   | 72           | 2.3           | 4           | 3           | -          | 2.5              | 1.8               | -                 | MMS-4A    | -            | -          |
| 20/06/2012  | 17.8       | 4   | 72           | 2.3           | 1           | 1           | -          | 0.6              | 0.6               | -                 | MMS-5A2   | -            | -          |
| 20/06/2012  | 17.8       | 5   | 24           | 2.3           | 1           | 1           | -          | 1.8              | 1.8               | -                 | MMS-2FG3  | -            | -          |
| 20/06/2012  | 17.8       | 5   | 48           | 2.3           | 4           | 3           | -          | 3.7              | 2.8               | -                 | MMS-2FG3b | -            | -          |
| 14/08/2012  | 23.2       | 4   | 96           | 2             | 5           | 5           | -          | 2.7              | 2.7               | -                 | MMS-7A    | -            | -          |
| 14/08/2012  | 23.2       | 4   | 120          | 2             | 14          | 13          | -          | 6.2              | 5.7               | -                 | MMS-8A    | -            | -          |
| 14/08/2012  | 23.2       | 4   | 167          | 1.9           | 4           | 3           | -          | 1.3              | 1.0               | -                 | MMS-9A    | -            | -          |
| 14/08/2012  | 23.2       | 4   | 192          | 1.8           | 40          | 39          | 12         | 13.4             | 13.0              | 7.4               | MMS-10A   | LN681522-33  | M. tur.    |
| 15/08/2012  | 23.2       | 4   | 238          | 1.8           | -           | -           | -          | -                | -                 | -                 | MMS-11A   | -            | -          |
| 31/08/2012  | 23.2       | 4   | 288          | 2.4           | 10          | 8           | 3          | 1.5              | 1.2               | 0.43              | MMS-12A   | LN681483-85  | M. pla.    |
| 12/11/2012  | 11.5       | 7   | 240          | 2.3           | 185         | 6           | -          | 63.1             | 1.3               | -                 | MMS-12Awh | -            | -          |
| 12/11/2012  | 11.5       | 7   | 240          | 2.3           | 171         | 58          | 1          | 53.4             | 12.1              | 0.2               | MMS-14A   | LN681486     | M. pla.    |
| 22/05/2013  | 13.2       | 8   | 120          | 1.6           | 20          | 11          | -          | 11.4             | 6.0               | -                 | MMS-IA    | -            | -          |
| 22/05/2013  | 13.2       | 9   | 120          | 1.6           | 40          | 22          | -          | 25.3             | 13.3              | -                 | MMS-IB    | -            | -          |
| 23/05/2013  | 13.2       | 9   | 168          | 2.0           | 128         | 95          | 2          | 71.8             | 44.5              | 0.6               | MMS-IIA   | LN681487-88  | M. pla.    |
| 23/05/2013  | 13.2       | 8   | 168          | 2.0           | 92          | 49          | -          | 39.7             | 17.2              | -                 | MMS-IIB   | -            | -          |
| 03/06/2013  | 12.3       | 10  | 264          | 1.7           | 264         | 191         | -          | 100              | 74.4              | -                 | MMS-III   | -            | -          |
| 13/06/2013  | 15.9       | 10  | 288          | 1.8           | 74          | 47          | -          | 17.0             | 10.2              | -                 | MMS-IV    | -            | -          |
| 15/07/2013  | 20.1       | 11  | 144          | 1.8           | 14          | 6           | 1          | 5.8              | 2.4               | 0.4               | MMS-VA    | LN681489     | M. pla.    |
| 15/07/2013  | 20.1       | 12  | 144          | 1.8           | 51          | 30          | 19         | 25.0             | 13.4              | 8.1               | MMS-VB    | LN681490-508 | M. pla.    |
| 14/08/2013  | 24.6       | 12  | 264          | 1.7           | 28          | 25          | 13         | 6.5              | 5.8               | 3.0               | MMS-VI    | LN681509-21  | M. pla.    |
| <b>SUM</b>  |            |     | <b>6507</b>  |               | <b>2077</b> | <b>788</b>  | <b>127</b> |                  |                   |                   |           |              |            |
| <b>MEAN</b> |            |     |              | <b>2.0</b>    |             |             |            | <b>24.8</b>      | <b>8.7</b>        | <b>2.7</b>        |           |              |            |

Abbreviations: water temp, water temperature, med, medium; # wells inoc, number of wells inoculated; # cells/well, number of cells inoculated per well; # + wells, number of wells with cells growing; # pure cult, number of pure cultures; # Meth, number of cultures affiliated with *Methylophilaceae*; V<sub>pos</sub>, total viability; V<sub>pure</sub>, viability of pure cultures; V<sub>meth</sub>, viability of isolates affiliated with *Methylophilaceae*; label, labeling scheme for pure cultures; Acc No, accession numbers; Meth affil, affiliation of isolated *Methylophilaceae*, M. pla., '*Candidatus Methylophilum planktonicum*' (LD28); M. tur., '*Candidatus Methylophilum turicensis*' (PRD01a001B).

**Media:**

- 1: filtered and autoclaved lake water (LW) + minimal carbon medium (MC)#1
- 2: LW + MC#1 + Vitamins (V)
- 3: LW + MC#1 + V + amino acids (AA)
- 4: LW + 10x MC#2 + V + AA
- 5: artificial lake water (ALW) + TES + 10x MC#2 + medium 4 (1:1)
- 6: ALW + 10x MC#2
- 7: LW + 10x MC#2 + MC#3 + V + AA
- 8: LW + MC#2 + MC#3 + inorganic basal medium (IBM) + stock4 + V + 10xAA
- 9: LW + pyruvate (50  $\mu$ M) + urea (0.5  $\mu$ M) + MC#4 + V + 10xAA
- 10: LW+ V + 10xAA
- 11: LW + MC#2 + pyruvate (50  $\mu$ M) + urea (0.5  $\mu$ M) + V + 10xAA
- 12: LW + pyruvate (50  $\mu$ M) + urea (0.5  $\mu$ M) + V + 10xAA

Minimal carbon medium (MC)#1: 1  $\mu$ M NH<sub>4</sub>Cl, 0.1  $\mu$ M K<sub>2</sub>HPO<sub>4</sub>, 11.1  $\mu$ M D-glucose, 13.3  $\mu$ M D-ribose, 22.7  $\mu$ M pyruvate, 21.7  $\mu$ M glycerol, 9  $\mu$ M N-acetylglucosamine, 0.1  $\mu$ M glutamate, 0.1  $\mu$ M glutamine, 0.05  $\mu$ M arginine, 0.1  $\mu$ M methionine, 0.1  $\mu$ M glycine

MC#2: 1  $\mu$ M NH<sub>4</sub>Cl, 0.1  $\mu$ M K<sub>2</sub>HPO<sub>4</sub>, 55.5  $\mu$ M D-glucose, 66.6  $\mu$ M D-ribose, 217.2  $\mu$ M formate, 217.2  $\mu$ M ethanol, 84.7  $\mu$ M succinate, 131.5  $\mu$ M glycolate, 108.6  $\mu$ M glycerol, 45.2  $\mu$ M N-acetylglucosamine

MC#3: 62.1  $\mu$ M putrescine, 39.3  $\mu$ M spermidine, 66.6  $\mu$ M D-xylose, 66.6  $\mu$ M arabinose

MC#4: 30  $\mu$ M NH<sub>4</sub>Cl, 50  $\mu$ M oxaloacetate, 50  $\mu$ M taurine, 1  $\mu$ M betaine, 40  $\mu$ M CaCl<sub>2</sub>

Amino acid solution (AA): 0.5  $\mu$ M isoleucine, leucine, lysine, methionine, alanine, phenylalanine, threonine, tryptophane, valine, arginine, histidine, asparagine, aspartate, cysteine, proline, serine, tyrosine, 2  $\mu$ M glutamine, glutamate, glycine

Vitamine solution (V): 0.593  $\mu$ M thiamine, 0.08  $\mu$ M niacin, 0.000074  $\mu$ M cobalamine, 0.005  $\mu$ M para-amino benzoic acid, 0.074  $\mu$ M pyridoxine, 0.081  $\mu$ M pantothenic acid, 0.004  $\mu$ M biotin, 0.004  $\mu$ M folic acid, 0.555  $\mu$ M myo-inositol

Artificial lake water (ALW, Zotina et al. 2003): 2 mM NaHCO<sub>3</sub>, 30  $\mu$ M KNO<sub>3</sub>, 200  $\mu$ M MgSO<sub>4</sub>, 40  $\mu$ M CaCl<sub>2</sub>, 160  $\mu$ M CaSO<sub>4</sub>, 30  $\mu$ M NH<sub>4</sub>Cl, 0.322  $\mu$ M K<sub>2</sub>HPO<sub>4</sub>

TES (trace element solution): 12  $\mu$ M FeCl<sub>3</sub>, 16  $\mu$ M H<sub>3</sub>BO<sub>3</sub>, 1  $\mu$ M MnCl<sub>2</sub>, 0.1  $\mu$ M ZnSO<sub>4</sub>, 0.04  $\mu$ M CuSO<sub>4</sub>, 0.04  $\mu$ M CoCl<sub>2</sub>, 0.03  $\mu$ M NaMoO<sub>4</sub>, 0.4  $\mu$ M NiCl<sub>2</sub>,

Inorganic basal medium (IBM, Hahn et al. 2003): 304  $\mu$ M MgSO<sub>4</sub>, 182  $\mu$ M Ca(NO<sub>3</sub>)<sub>2</sub>, 190  $\mu$ M NaHCO<sub>3</sub>, 20  $\mu$ M KCl, 16  $\mu$ M K<sub>2</sub>HP<sub>4</sub>, 17  $\mu$ M Na<sub>2</sub>EDTA-Fe, 0.1 ml TES

**References:**

Hahn M, Lünsdorf H, Wu Q, Schauer M, Höfle M, Boenigk J *et al* (2003). Isolation of novel ultramicrobacteria classified as *Actinobacteria* from five freshwater habitats in Europe and Asia. *Appl Environ Microbiol* **69**: 1442-1451.

Zotina T, Köster O, Jüttner F (2003). Photoheterotrophy and light-dependent uptake of organic and organic nitrogenous compounds by *Planktothrix rubescens* under low irradiance. *Freshwater Biol* **48**: 1859-1872.

**Table S2:** Genes involved in methylotrophic pathways present in the genomes of ‘Ca. Methylopumilus planktonicus’ MMS-2-53 (Acc. No. LN827929) and ‘Ca. Methylopumilus turicensis’ MMS-10A-171 (Acc. No LN794158).

| Pathway                                          | Gene                           | Protein/function                                                                                                                  | ‘Ca. M. planktonicus’ MMS-2-53 | ‘Ca. M. turicensis’ MMS-10A-171 |
|--------------------------------------------------|--------------------------------|-----------------------------------------------------------------------------------------------------------------------------------|--------------------------------|---------------------------------|
| Methanol oxidation                               | <i>xoxF</i>                    | Homologue of MDH large subunit                                                                                                    | BN1208_1208                    | BN1209_1575                     |
|                                                  | <i>xoxJ</i>                    | unknown                                                                                                                           | BN1208_1207                    | BN1209_1574                     |
|                                                  | <i>xoxG</i>                    | cytochrome c, electron acceptor from MDH                                                                                          | BN1208_1206                    | BN1209_1572, BN1209_1573        |
|                                                  | <i>mxar</i>                    | unknown                                                                                                                           | BN1208_0638                    | BN1209_0567                     |
|                                                  | <i>mxas</i>                    | unknown                                                                                                                           | BN1208_0637                    | BN1209_0566                     |
|                                                  | <i>mxaa</i>                    | Ca <sup>2+</sup> insertion into MDH                                                                                               | BN1208_0636                    | BN1209_0565                     |
|                                                  | <i>mxac</i>                    | Ca <sup>2+</sup> insertion into MDH                                                                                               | BN1208_0635                    | BN1209_0564                     |
|                                                  | <i>mxak</i>                    | Ca <sup>2+</sup> insertion into MDH                                                                                               | BN1208_0634                    | BN1209_0563                     |
|                                                  | <i>mxal</i>                    | Ca <sup>2+</sup> insertion into MDH                                                                                               | BN1208_0633                    | BN1209_0562                     |
|                                                  | <i>mxad</i>                    | unknown                                                                                                                           | BN1208_0373                    | BN1209_0453                     |
|                                                  | <i>pqqB</i>                    | PQQ biosynthesis                                                                                                                  | BN1208_0720                    | BN1209_0756                     |
|                                                  | <i>pqqC</i>                    | PQQ biosynthesis                                                                                                                  | BN1208_0721                    | BN1209_0757                     |
|                                                  | <i>pqqD</i>                    | PQQ biosynthesis                                                                                                                  | BN1208_0722                    | BN1209_0758                     |
|                                                  | <i>pqqE</i>                    | PQQ biosynthesis                                                                                                                  | BN1208_0723                    | BN1209_0759                     |
|                                                  | <i>pqqF</i>                    | PQQ biosynthesis                                                                                                                  | BN1208_1061                    | BN1209_1323                     |
| <i>pqqG</i>                                      | PQQ biosynthesis               | BN1208_1060                                                                                                                       | BN1209_1322                    |                                 |
| H <sub>4</sub> F-linked form-aldehyde oxidation  | <i>foID</i>                    | Methylenetetrahydrofolate dehydrogenase (NADP <sup>+</sup> ) (EC 1.5.1.5) / Methylenetetrahydrofolate cyclohydrolase (EC 3.5.4.9) | BN1208_0070                    | BN1209_0056                     |
|                                                  | <i>fhs</i>                     | Formate-tetrahydrofolate ligase                                                                                                   | BN1208_0733                    | -                               |
|                                                  | <i>metF</i>                    | 5,10-methylenetetrahydrofolate reductase                                                                                          | BN1208_0111                    | BN1209_0102, BN1209_0103        |
|                                                  | <i>ygfZ</i>                    | glycine cleavage T protein (aminomethyl transferase)                                                                              | BN1208_0632                    | BN1209_0560                     |
| H <sub>4</sub> MPT-linked formaldehyde oxidation | <i>fhcA</i>                    | formyltransferase/hydrolase complex subunit A                                                                                     | -                              | BN1209_0742                     |
|                                                  | <i>fhcD</i>                    | formyltransferase/hydrolase complex subunit D                                                                                     | -                              | BN1209_0741                     |
|                                                  | <i>fhcC</i>                    | formyltransferase/hydrolase complex subunit C                                                                                     | -                              | BN1209_0740                     |
|                                                  | <i>mptG</i>                    | beta-ribofuranosylamino-benzene 5-phosphate synthase                                                                              | -                              | BN1209_0744                     |
|                                                  | <i>mtdB</i>                    | methylene H <sub>4</sub> MPT dehydrogenase                                                                                        | -                              | BN1209_0745                     |
|                                                  | <i>orfY</i>                    | unknown                                                                                                                           | -                              | BN1209_0746                     |
|                                                  | <i>mch</i>                     | methenyl H <sub>4</sub> MPT cyclohydrolase                                                                                        | -                              | BN1209_0747                     |
|                                                  | <i>orf5</i>                    | biosynthesis of H <sub>4</sub> MPT                                                                                                | -                              | BN1209_0748                     |
|                                                  | <i>orf7</i>                    | unknown                                                                                                                           | -                              | BN1209_0749                     |
|                                                  | <i>fae</i>                     | formaldehyde activating enzyme                                                                                                    | -                              | BN1209_1682                     |
|                                                  | <i>orf17</i>                   | unknown                                                                                                                           | -                              | BN1209_0773                     |
|                                                  | <i>orf1</i>                    | unknown                                                                                                                           | -                              | BN1209_0774                     |
|                                                  | <i>orf9</i>                    | biosynthesis of H <sub>4</sub> MPT                                                                                                | -                              | BN1209_0775                     |
|                                                  | <i>pabB</i>                    | para-aminobenzoate synthase component I                                                                                           | -                              | BN1209_0776, BN1209_1662        |
|                                                  | <i>orf21</i>                   | biosynthesis of H <sub>4</sub> MPT                                                                                                | -                              | BN1209_0777                     |
|                                                  | <i>pcbD</i>                    | unknown                                                                                                                           | -                              | BN1209_0778                     |
|                                                  | <i>orf22</i>                   | biosynthesis of H <sub>4</sub> MPT                                                                                                | -                              | BN1209_0842                     |
|                                                  | <i>orf19</i>                   | biosynthesis of H <sub>4</sub> MPT                                                                                                | -                              | BN1209_0841                     |
|                                                  | <i>orf20</i>                   | biosynthesis of H <sub>4</sub> MPT                                                                                                | -                              | BN1209_0840                     |
| <i>afp</i>                                       | dihydromethanopterin reductase | -                                                                                                                                 | BN1209_0839                    |                                 |

| Pathway                                                                                    | Gene        | Protein/function                            | 'Ca. M.<br>planktonicus'<br>MMS-2-53 | 'Ca. M.<br>turicensis'<br>MMS-10A-171 |
|--------------------------------------------------------------------------------------------|-------------|---------------------------------------------|--------------------------------------|---------------------------------------|
| <b>Formate<br/>oxidation</b>                                                               | <i>fdhA</i> | formate dehydrogenase alpha subunit         | BN1208_1192                          | BN1209_0677                           |
|                                                                                            | <i>fdhB</i> | formate dehydrogenase beta subunit          | BN1208_1193                          | BN1209_0676,<br>BN1209_1191           |
|                                                                                            | <i>fdhC</i> | formate dehydrogenase gamma subunit         | BN1208_1194                          | BN1209_0675                           |
|                                                                                            | <i>fdhD</i> | formate dehydrogenase accessory protein     | BN1208_1191                          | BN1209_0678                           |
|                                                                                            | <i>fdhE</i> | formate dehydrogenase delta subunit         | BN1208_1190                          | BN1209_0679                           |
| <b>Ribulose monophosphate (RuMP)<br/>cycle for formaldehyde<br/>assimilation/oxidation</b> | <i>hps</i>  | 3-hexulose-6-phosphate synthase             | BN1208_0845                          | BN1209_0202,<br>BN1209_0771           |
|                                                                                            | <i>hpi</i>  | 6-phospho-3-hexuloisomerase                 | BN1208_0844                          | BN1209_0772                           |
|                                                                                            | <i>tal</i>  | transaldolase                               | BN1208_0846,<br>BN1208_0901          | BN1209_0770                           |
|                                                                                            | <i>pgi</i>  | glucose 6-phosphate isomerase               | BN1208_0816                          | BN1209_0914                           |
|                                                                                            | <i>zwf</i>  | glucose 6-phosphate dehydrogenase           | BN1208_0649                          | BN1209_0580                           |
|                                                                                            | <i>pgl</i>  | 6-phosphogluconolactonase                   | BN1208_0650                          | BN1209_0581                           |
|                                                                                            | <i>gndA</i> | 6-phosphogluconolactonase                   | BN1208_0651                          | BN1209_0582                           |
|                                                                                            | <i>gndB</i> | 6-phosphogluconate dehydrogenase (NADP)     | -                                    | BN1209_0428                           |
|                                                                                            | <i>edd</i>  | 6-phosphogluconate dehydratase              | BN1208_1051                          | BN1209_1306                           |
|                                                                                            | <i>eda</i>  | 2-dehydro-3-deoxy-phosphogluconate aldolase | BN1208_1050                          | BN1209_1305                           |
|                                                                                            | <i>tkt</i>  | transketolase                               | BN1208_1157                          | BN1209_1513                           |
|                                                                                            | <i>rpe</i>  | ribulose-phosphate 3-epimerase              | BN1208_1297                          | BN1209_1663                           |
|                                                                                            | <i>ppi</i>  | ribose-5-phosphate isomerase                | BN1208_0100,<br>BN1208_0677          | BN1209_0087,<br>BN1209_0663           |

**Figure S1:** Relative abundances (in % of DAPI) of microbes affiliated with LD28 ('*Cand. Methylopumilus planktonicus*', upper panel) and PRD01a001B ('*Cand. Methylopumilus turicensis*', lower panel) determined in Lake Zurich, Switzerland, during the investigation period 2008-2011.

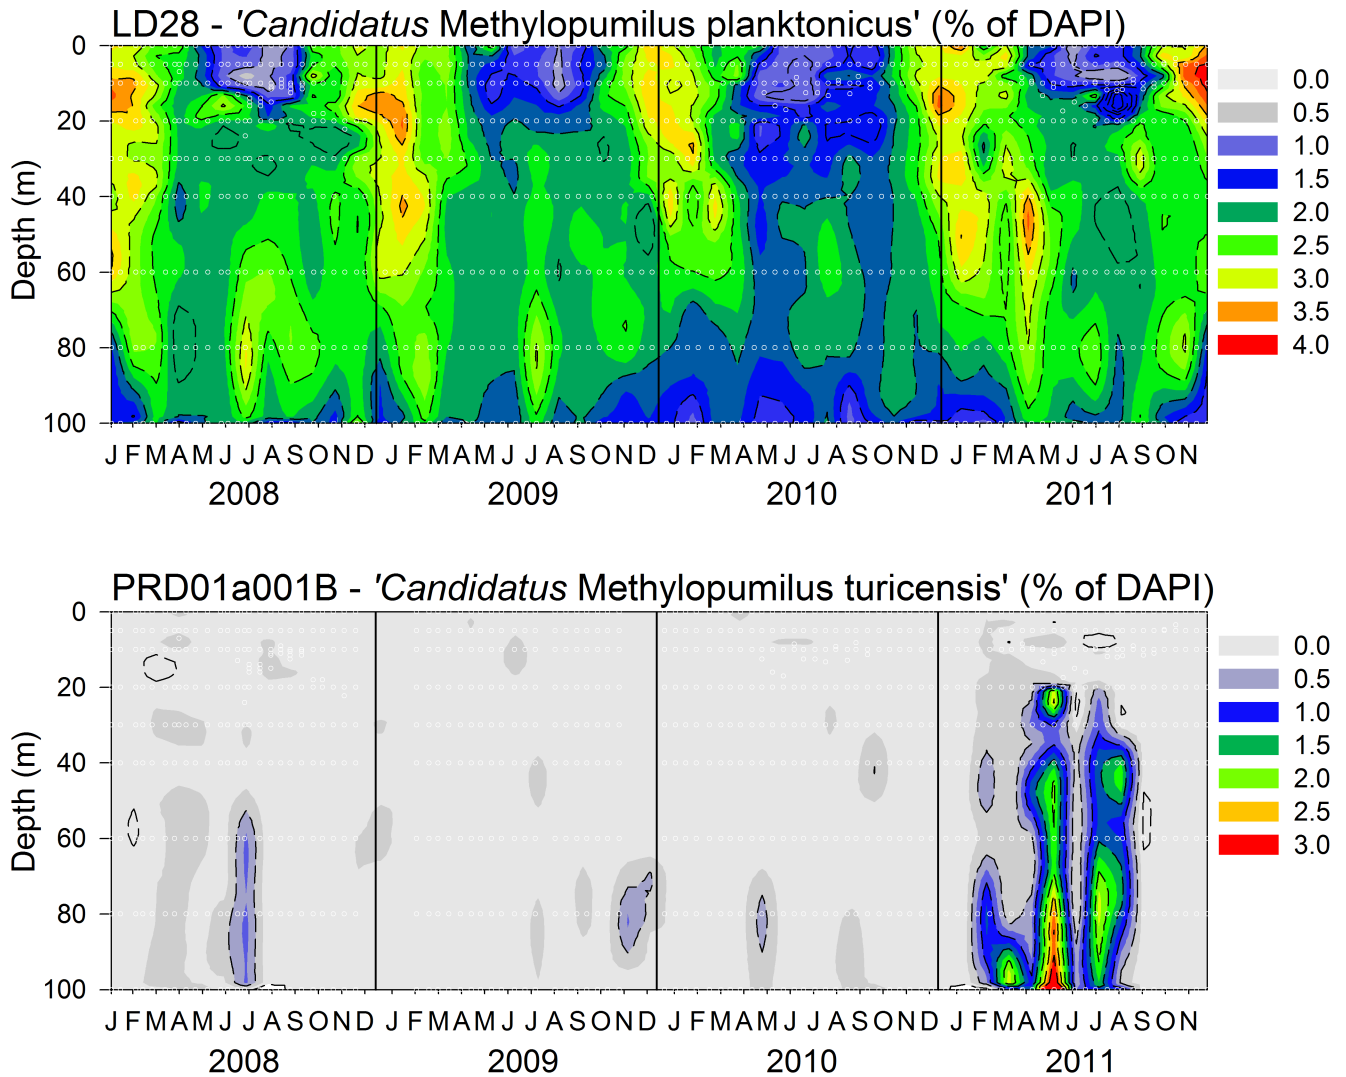

**Figure S2:** Physical, chemical, and biological parameters determined in Lake Zurich, Switzerland, during the investigation period 2008-2011.

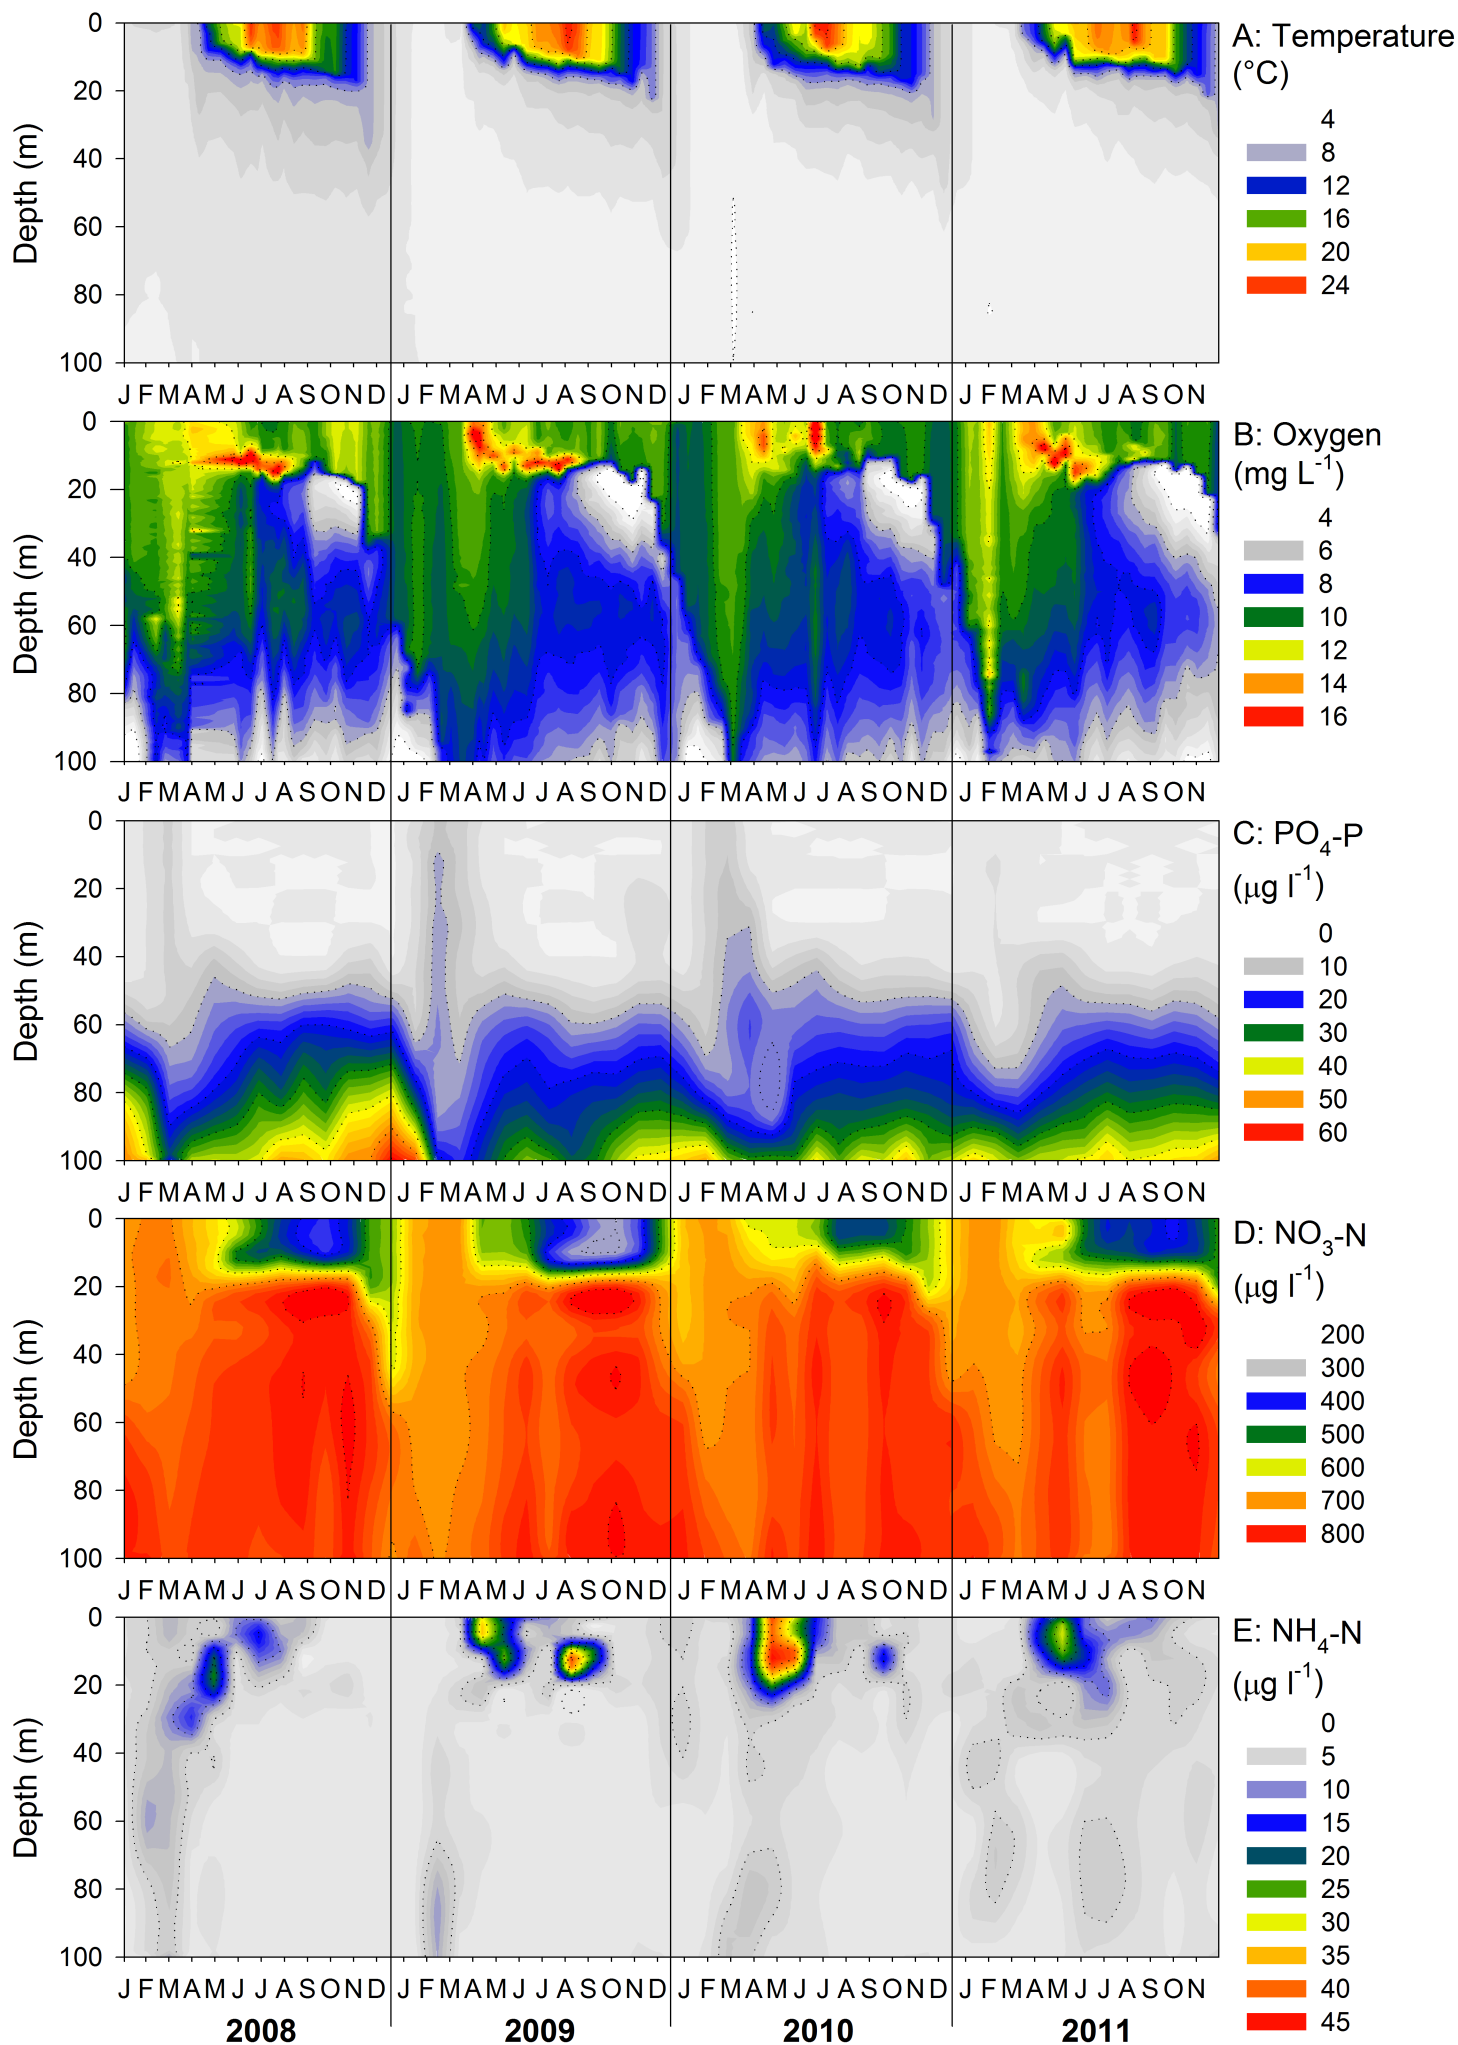

Figure S2 continued

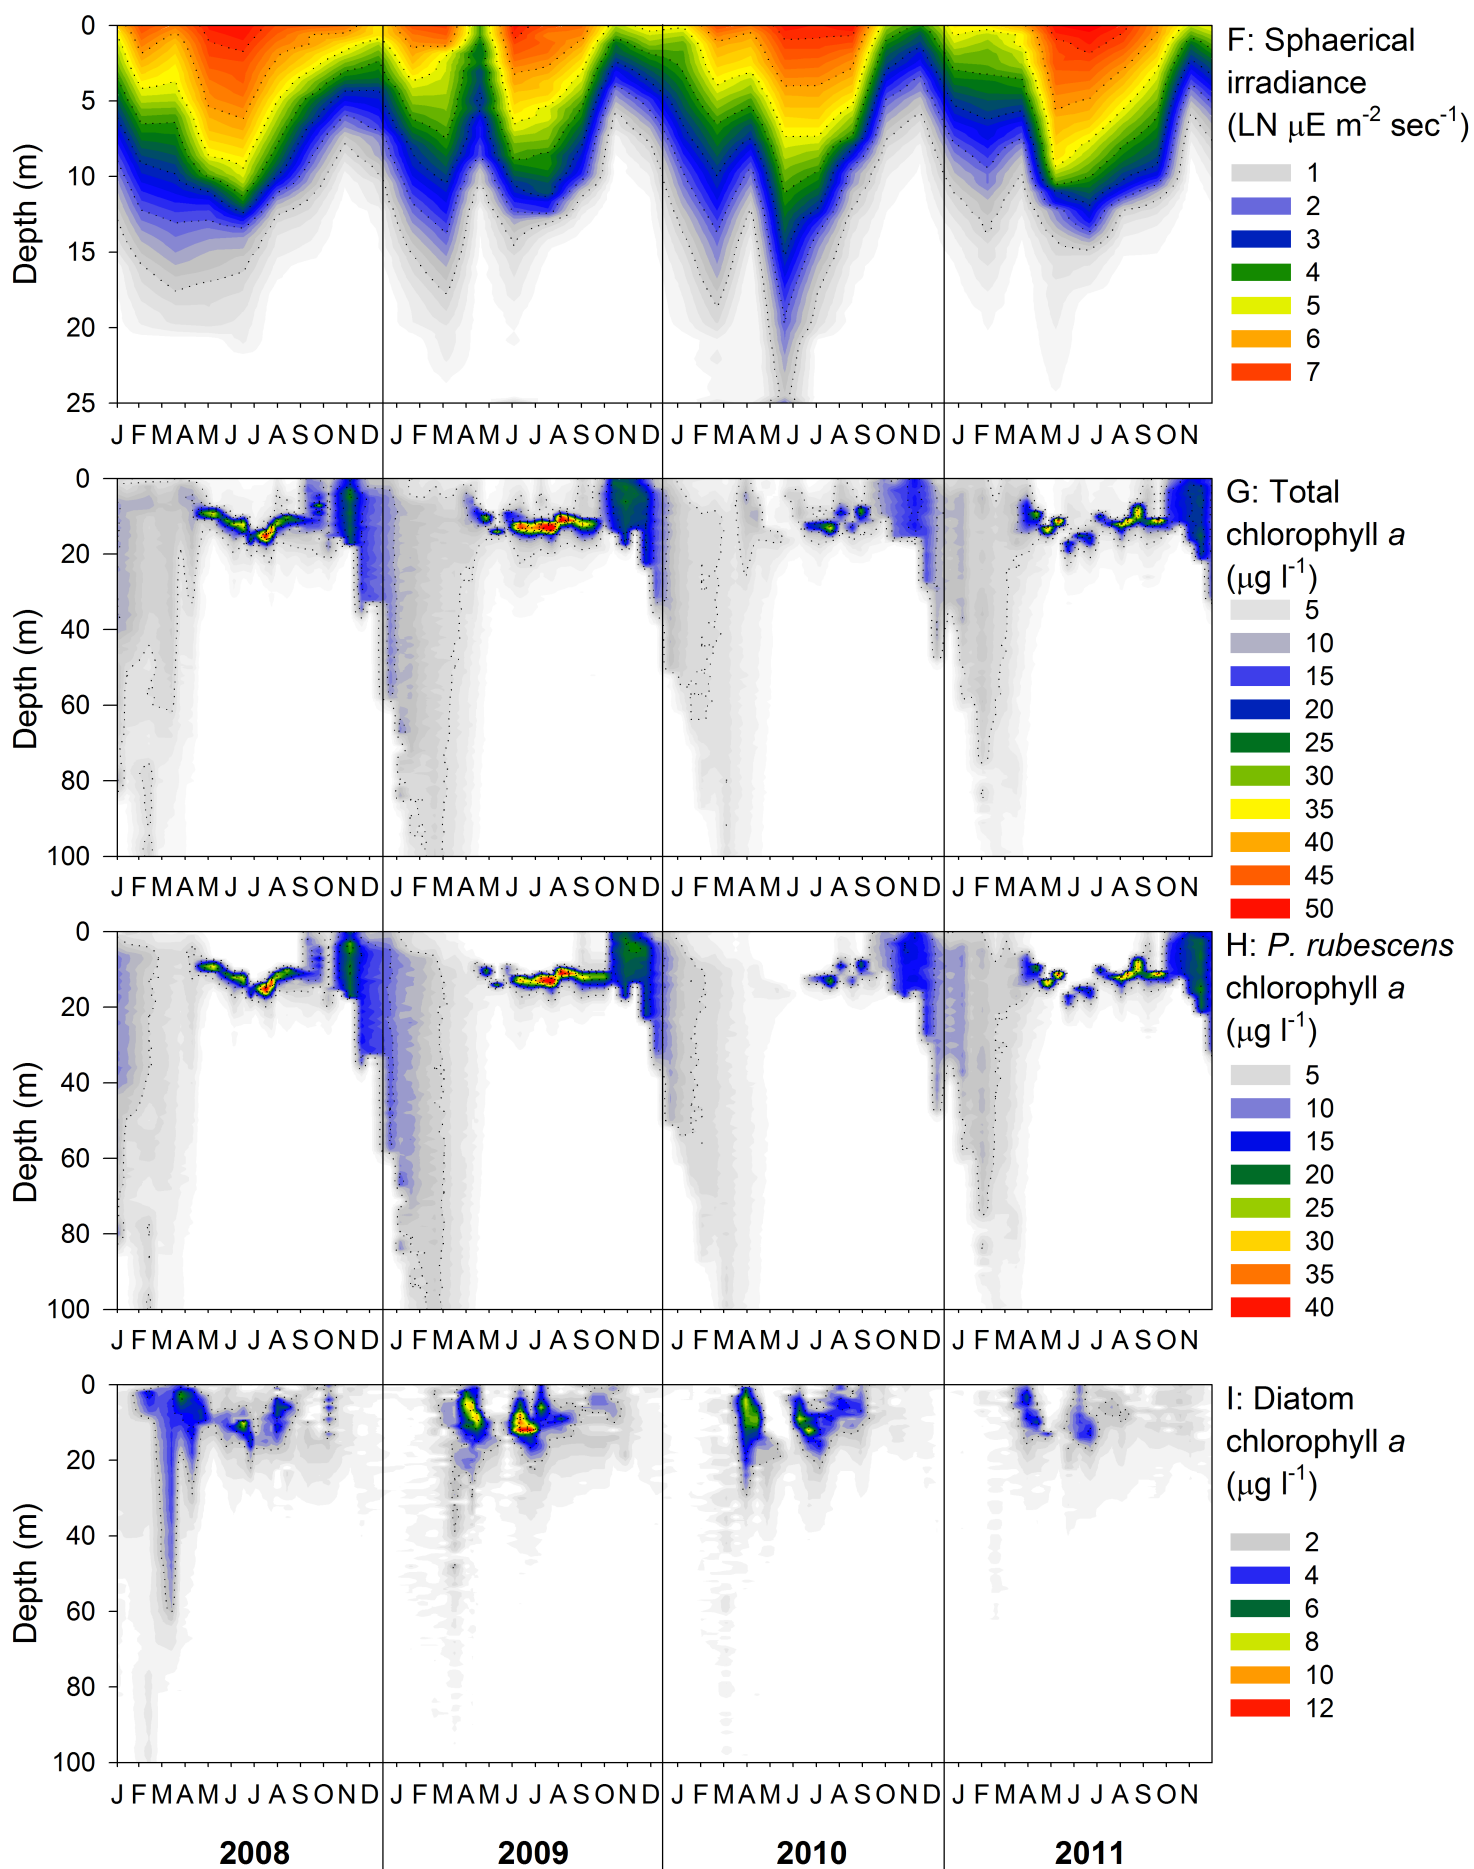



Figure S3: Bootstrapped maximum likelihood tree (GTR-Gamma model) of the 16S rDNA of microbes affiliated with LD28 (*Ca. Methylopumilus planktonicus*). Sequences in bold represent isolated strains from Lake Zurich (see table S1 for abbreviations). The scale bar at the bottom represents 1 % estimated sequence divergence.

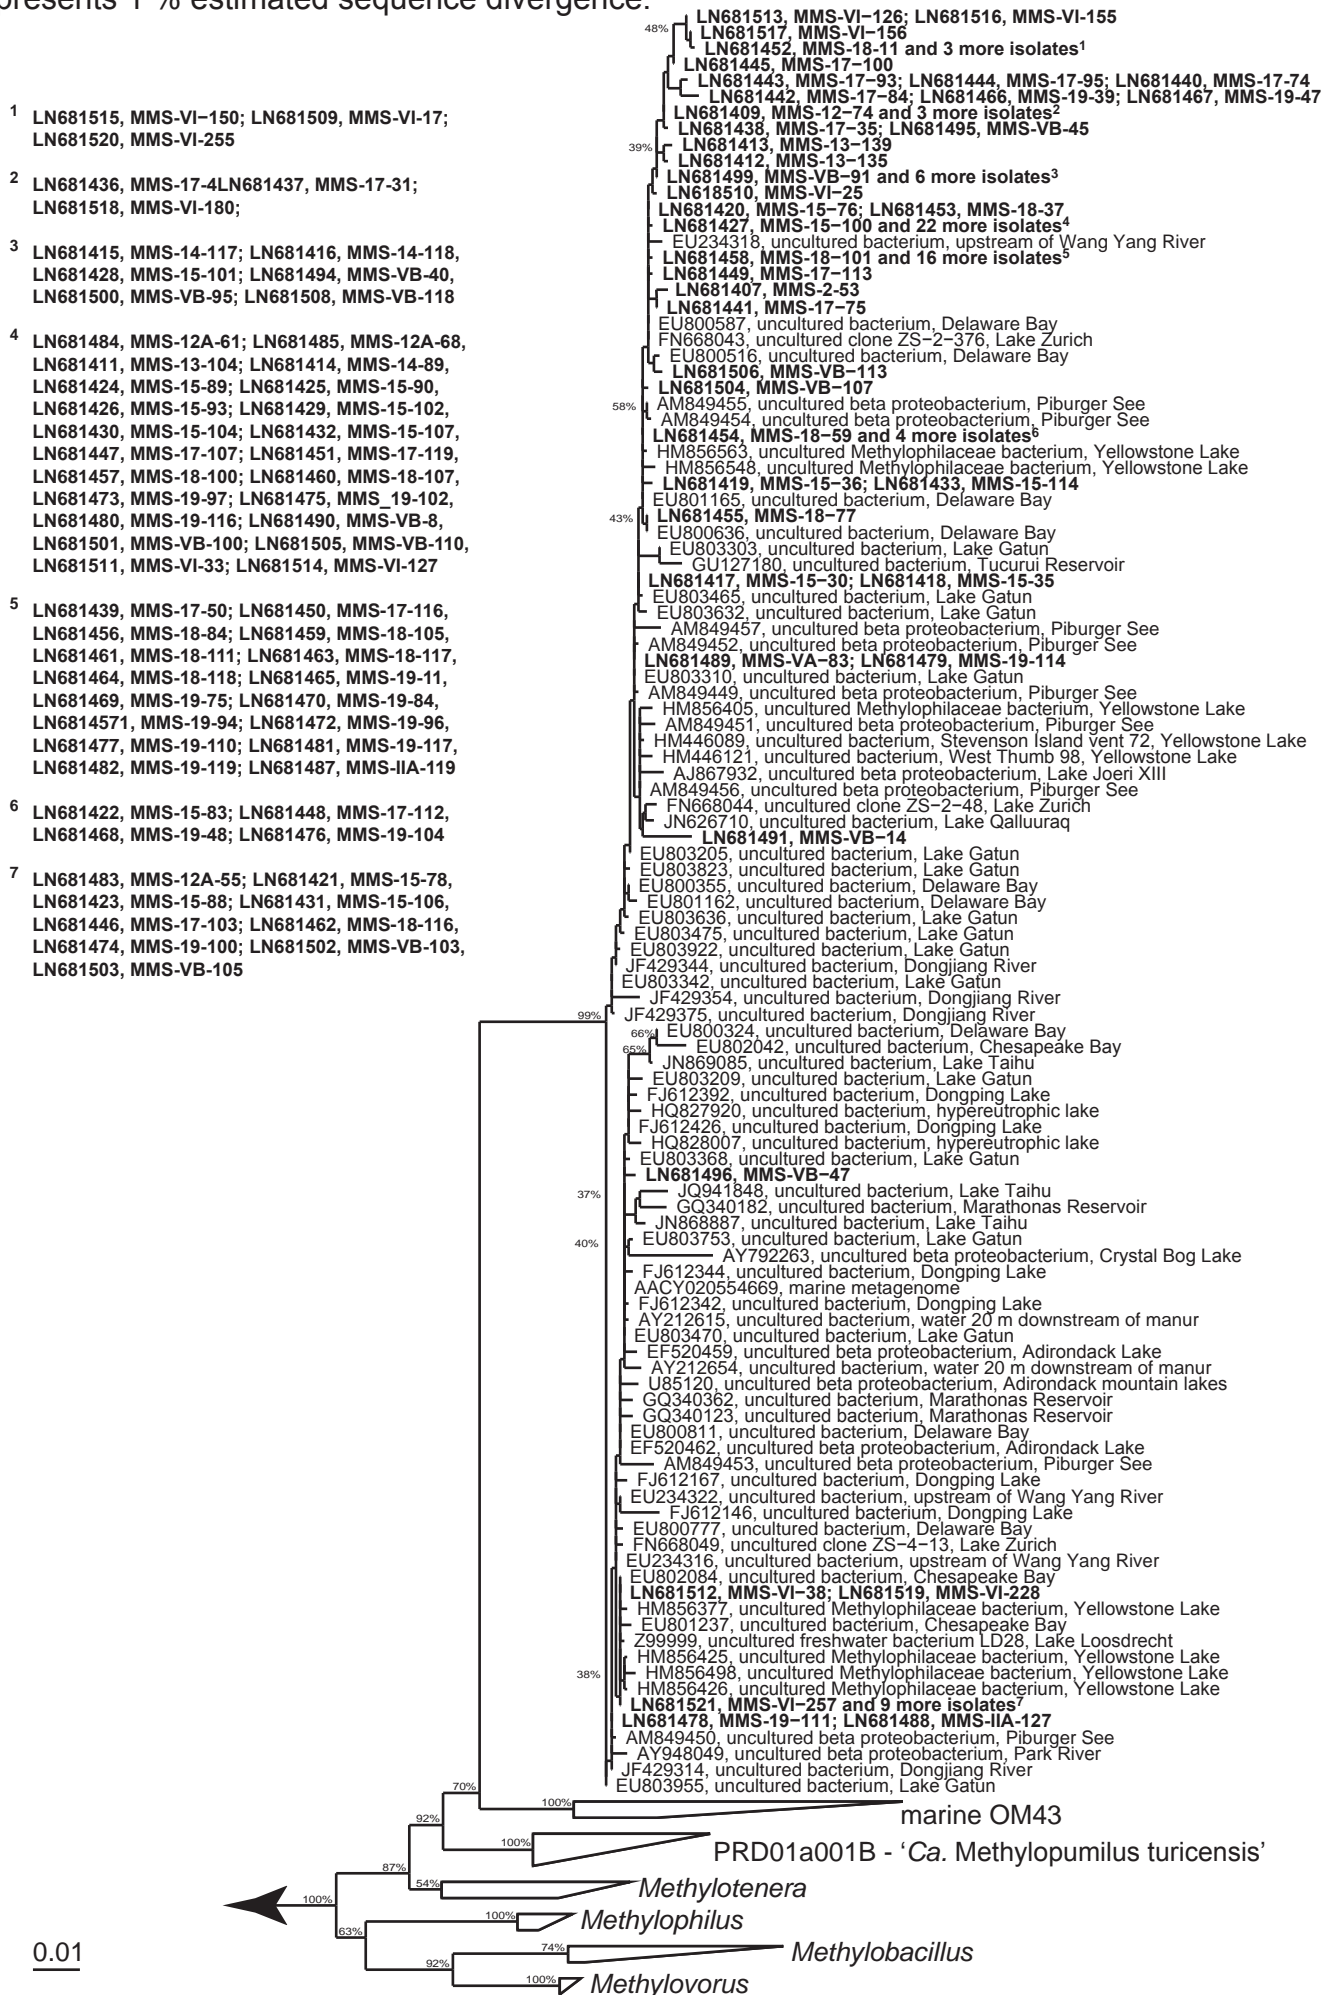

**Figure S4:** Bootstrapped maximum likelihood tree (GTR-Gamma model) of the 16S rDNA of microbes affiliated with PRD01a001B ('*Ca. Methylopusillus turicensis*'). Sequences in bold represent isolated strains from Lake Zurich (see table S1 for abbreviations). The scale bar at the bottom represents 1 % estimated sequence divergence.

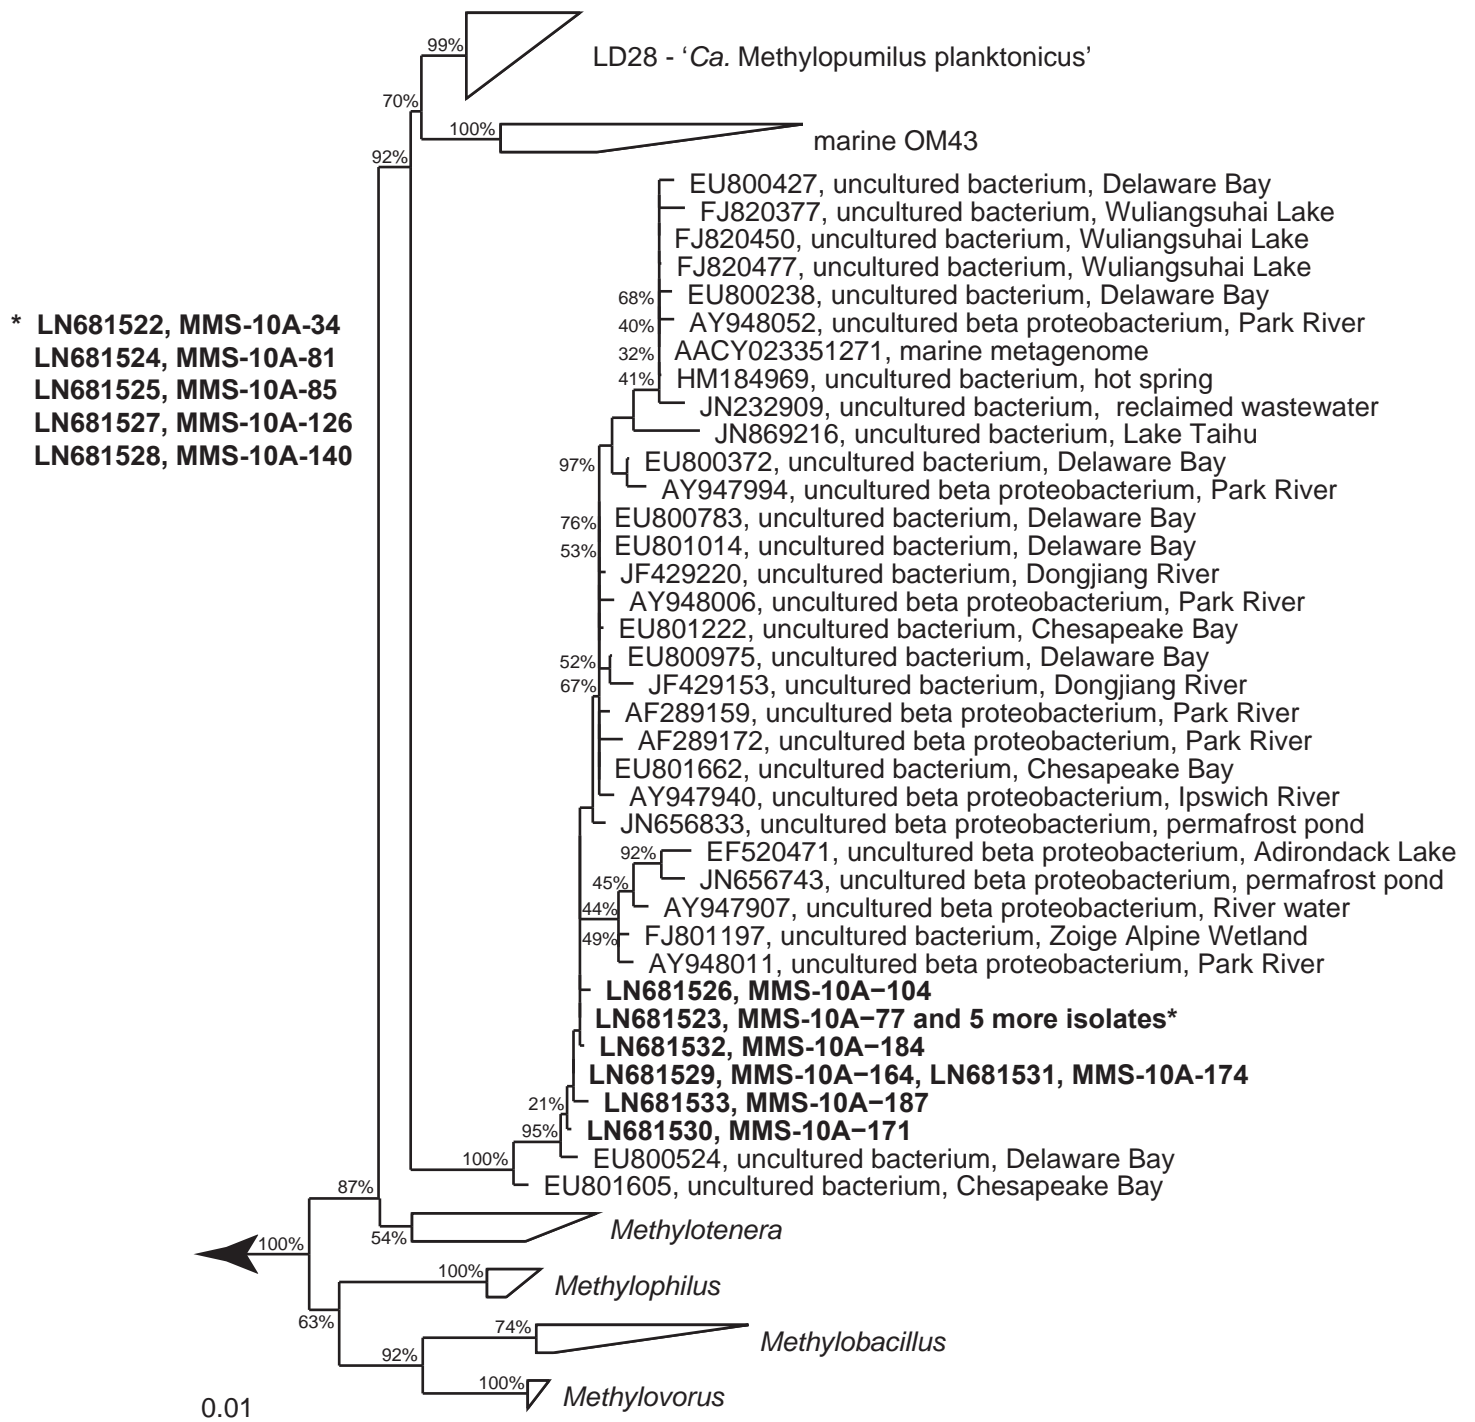

Fig. S5: Graphic circular genome map of 'Ca. Methylopusillus planktonicus' strain MMS-2-53. From outside to the center: Genes on forward strand, genes on reverse strand (both coloured in COG categories), BLASTx comparison to 3 closely related taxa ('Ca. Methylopusillus turicensis' MMS-10A-171, HTCC2181 of the marine OM43 lineage, and *Methylopusillus mobilis* JLW8), GC content, GC skew.

COG classification was done with the WebMGA server (Wu et al., 2011) and the genome was displayed with the CGView server (Grant et al. 2008).

References:

Wu S, Zhu Z, Fu L, Niu B, Li W (2011). WebMGA: a customizable web server for fast metagenomic sequence analysis. BMC Genomics 12: 444.

Grant JR, Stothard P (2008) The CGView Server: a comparative genomics tool for circular genomes. Nucleic Acids Res 36:W181-W184.

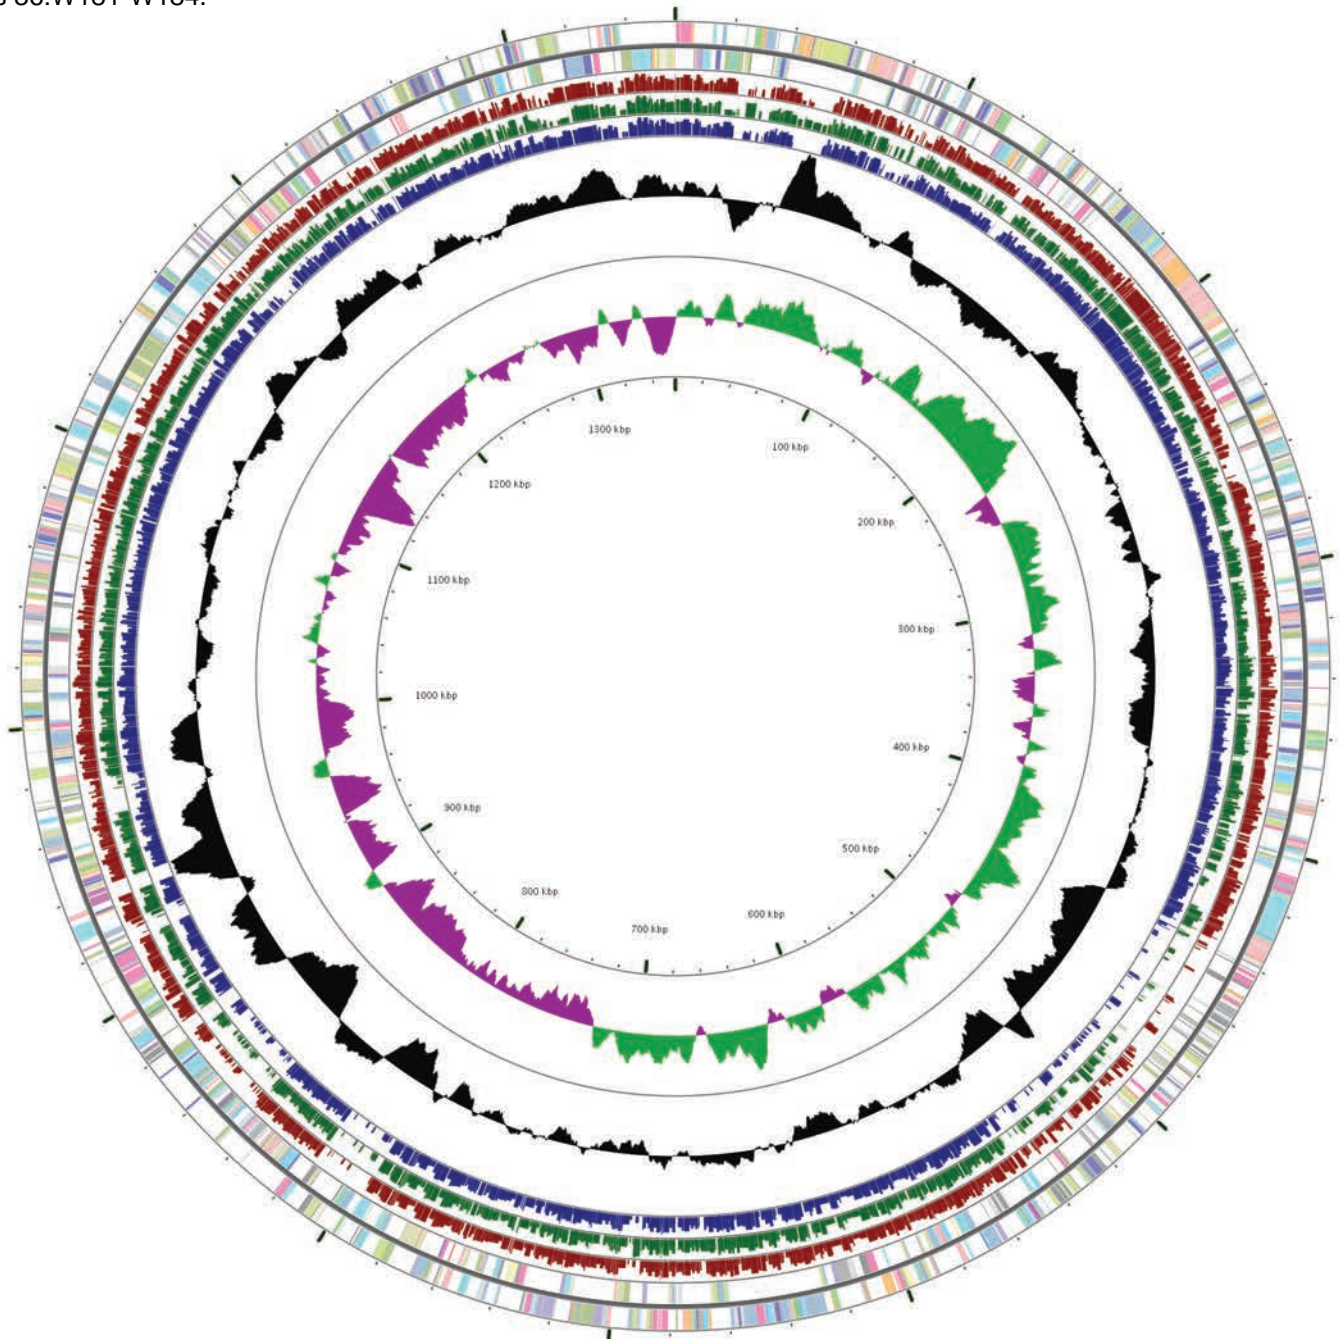

COG categories:

|                                         |                                             |                                             |                                                 |                                                                                           |
|-----------------------------------------|---------------------------------------------|---------------------------------------------|-------------------------------------------------|-------------------------------------------------------------------------------------------|
| <span style="color: red;">■</span> A    | <span style="color: olive;">■</span> M      | <span style="color: lightgreen;">■</span> Y | <span style="color: purple;">■</span> I         | <span style="color: darkred;">■</span> BLAST results 'Ca. M. tur.' MMS-10A-171            |
| <span style="color: orange;">■</span> B | <span style="color: green;">■</span> N      | <span style="color: yellow;">■</span> Z     | <span style="color: blue;">■</span> Q           | <span style="color: darkgreen;">■</span> BLAST results marine HTCC2181 (OM43)             |
| <span style="color: pink;">■</span> J   | <span style="color: lightgreen;">■</span> P | <span style="color: cyan;">■</span> C       | <span style="color: grey;">■</span> R           | <span style="color: darkblue;">■</span> BLAST results <i>Methylopusillus mobilis</i> JLW8 |
| <span style="color: orange;">■</span> K | <span style="color: green;">■</span> T      | <span style="color: cyan;">■</span> G       | <span style="color: grey;">■</span> S           | <span style="color: black;">■</span> GC content                                           |
| <span style="color: pink;">■</span> L   | <span style="color: lightgreen;">■</span> U | <span style="color: lightblue;">■</span> E  | <span style="color: grey;">■</span> unknown COG | <span style="color: green;">■</span> GC skew +                                            |
| <span style="color: yellow;">■</span> D | <span style="color: teal;">■</span> V       | <span style="color: lightblue;">■</span> F  | <span style="color: brown;">■</span> tRNA       | <span style="color: purple;">■</span> GC skew -                                           |
| <span style="color: olive;">■</span> O  | <span style="color: lightgreen;">■</span> W | <span style="color: blue;">■</span> H       | <span style="color: purple;">■</span> rRNA      |                                                                                           |

Fig. S6: Graphic circular genome map of 'Ca. Methylopusillus turicensis' strain MMS-10A-171. From outside to the center: Genes on forward strand, genes on reverse strand (both coloured in COG categories), BLASTx comparison to 3 closely related taxa ('Ca. Methylopusillus planktonicus' MMS-2-53, *Methylotenera mobilis* JLW8, and *Methylobacillus flagellatus* KT), GC content, GC skew. COG classification was done with the WebMGA server (Wu et al., 2011) and the genome was displayed with the CGView server (Grant et al. 2008).

References:

Wu S, Zhu Z, Fu L, Niu B, Li W (2011). WebMGA: a customizable web server for fast metagenomic sequence analysis. BMC Genomics 12: 444.

Grant JR, Stothard P (2008) The CGView Server: a comparative genomics tool for circular genomes. Nucleic Acids Res 36:W181-W184.

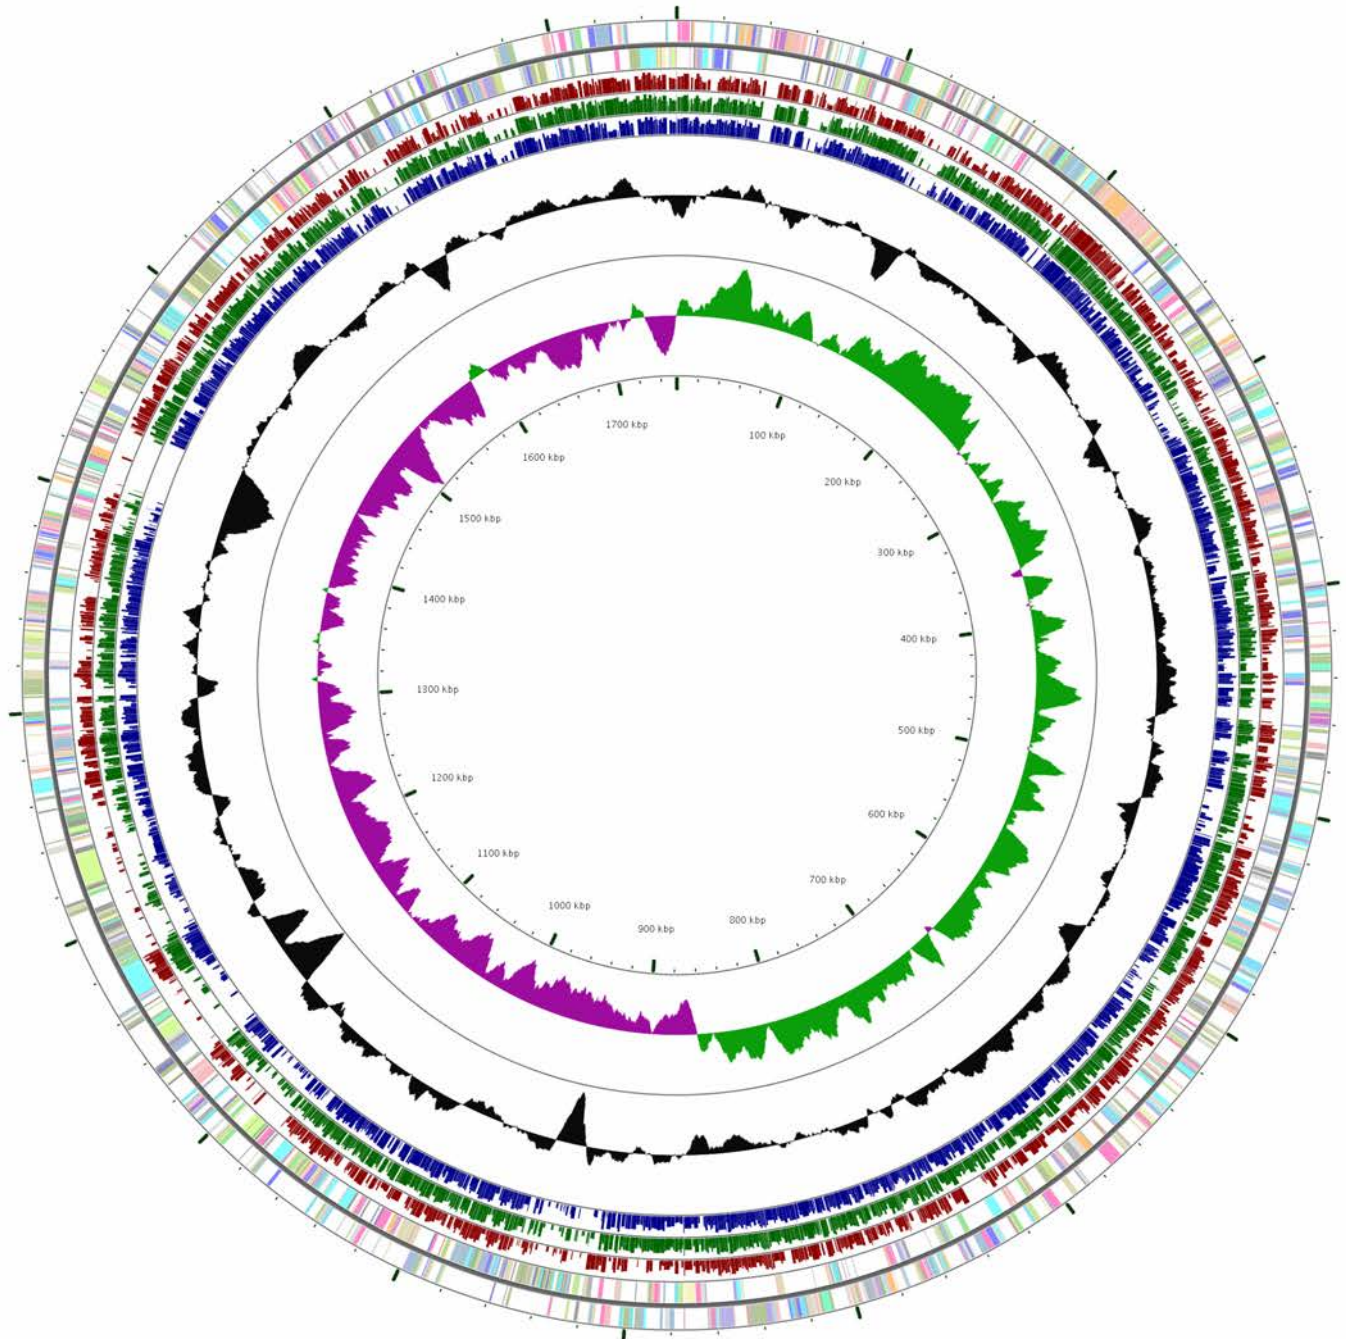

COG categories:

|                                         |                                             |                                             |                                                 |                                                                                          |
|-----------------------------------------|---------------------------------------------|---------------------------------------------|-------------------------------------------------|------------------------------------------------------------------------------------------|
| <span style="color: red;">■</span> A    | <span style="color: olive;">■</span> M      | <span style="color: lightgreen;">■</span> Y | <span style="color: purple;">■</span> I         | <span style="color: darkred;">■</span> BLAST results 'Ca. M. pla.' MMS-2-53              |
| <span style="color: orange;">■</span> B | <span style="color: green;">■</span> N      | <span style="color: yellow;">■</span> Z     | <span style="color: blue;">■</span> Q           | <span style="color: darkgreen;">■</span> BLAST results <i>Methylotenera mobilis</i> JLW8 |
| <span style="color: pink;">■</span> J   | <span style="color: lightgreen;">■</span> P | <span style="color: cyan;">■</span> C       | <span style="color: grey;">■</span> R           | <span style="color: blue;">■</span> BLAST results <i>Methylobacillus flagellatus</i> KT  |
| <span style="color: orange;">■</span> K | <span style="color: green;">■</span> T      | <span style="color: cyan;">■</span> G       | <span style="color: grey;">■</span> S           | <span style="color: black;">■</span> GC content                                          |
| <span style="color: pink;">■</span> L   | <span style="color: lightgreen;">■</span> U | <span style="color: lightblue;">■</span> E  | <span style="color: grey;">■</span> unknown COG | <span style="color: green;">■</span> GC skew +                                           |
| <span style="color: yellow;">■</span> D | <span style="color: cyan;">■</span> V       | <span style="color: lightblue;">■</span> F  | <span style="color: brown;">■</span> tRNA       | <span style="color: purple;">■</span> GC skew -                                          |
| <span style="color: olive;">■</span> O  | <span style="color: green;">■</span> W      | <span style="color: blue;">■</span> H       | <span style="color: purple;">■</span> rRNA      |                                                                                          |
